# Supplementary material for: Novel protocol for metabolomics data normalization and biomarker discovery in human tears
Source: publisher site journal article supplement (doi:10.1515/cclm-2024-1360), 2025-03-17
Supplement: Supplementary file 1 [file j_cclm-2024-1360_suppl_001.xlsx]

## Sheet: Acyl Carnitines
Sample	Sex	Age	Fasting time (min)	0 = self-induced 1=menthol	C0	C2	C3	C4	C5	C5-DC (C6-OH)	C5-OH (C3-DC-M)	C6 (C4:1-DC)	C10	C12	C12:1
RF_001	1	20,2	120	0	0,753333333	0,74	0,124	0,048666667	0,44	0,013333333	0,020666667	0,010333333	0,040333333	0,033333333	0,073333333
RF_002	1	18,7	5	0	0,9925	0,6575	0,0565	0,0265	0,07975	0,012	0,0115	0,02225	0,0365	0,02625	0,06325
RF_003	1	48	60	0	6,025	0,8225	0,15325	0,0545	0,18075	0,011	0,016	0,01175	0,07725	0,024	0,06325
RF_005	1	28,6	120	0	0,7775	1,0325	0,134	0,0335	0,206	0,009	0,0185	0,0085	0,03025	0,02125	0,06225
RF_007	0	19	480	0	0,7925	0,875	0,2245	0,064	0,5325	0,01425	0,01975	0,00875		0,01475	0,05625
RF_008	1	36,1	210	0	0,7175	0,755	0,0905	0,02725	0,2205	0,007	0,01375	0,008	0,031	0,0175	0,057
RF_010	1	20,5	120	1	1,395	0,5775	0,1505	0,042	0,2625	0,01875	0,01875	0,01025	0,02825	0,018	0,05375
RF_011	1	66,2	210	1		0,43255814	0,11627907	0,047674419	0,252325581				0,127906977	0,065116279	0,198837209
RF_014	1	20,7	60	1	0,855	0,41	0,10575	0,0355	0,635	0,01225	0,0115	0,009	0,03075	0,02075	0,06775
RF_015	1	70	60	1		0,528666667	0,160666667	0,051333333	0,217333333	0,010666667	0,028		0,074666667	0,044666667	0,146
RF_016	1	60,7	150	1	1,114130435	0,421195652	0,098369565	0,036413043	0,198369565	0,009782609	0,02173913			0,035326087	0,093478261
RF_017	1	26	240	1		0,082	0,037	0,01225	0,1165			0,007	0,04175	0,04725	0,079
RF_019	1	21	180	1	1,6725	0,51	0,182	0,06475	0,5825	0,01025	0,01975	0,01275	0,0425	0,02725	0,086
RF_021	1	68	150	1	0,97	0,65	0,1105	0,036	0,1185	0,0145	0,0215	0,0145		0,0335	0,1085
RF_022	1	63	150	1	0,856666667	0,59	0,159666667	0,052666667	0,208333333	0,021666667	0,023333333	0,016	0,068	0,061333333	0,112333333
RF_023	1	67,5	150	1	2,4675	0,8625	0,09825	0,04475	0,5825	0,011	0,017	0,00875	0,06	0,0475	0,08075
RF_024	1	24,6	60	1	1,075	0,4325	0,057	0,01725	0,145	0,00725	0,01275	0,00875	0,036	0,01975	0,0665
RF_025	1	65	180	1	2,85	0,825	0,24925	0,105	0,7475	0,01	0,02075	0,01	0,04	0,0195	0,0605
RF_027	0	63,7	255	1		0,436551724	0,131724138	0,037241379	0,366206897	0,013793103	0,026206897	0,024827586		0,045517241	0,100689655
RF_028	1	22	255	1	1,06	0,3475	0,1095	0,02825	0,1945	0,00925	0,0165	0,01575	0,04	0,02775	0,07675
RF_029	1	22,8	60	1	2,557142857	0,5	0,113214286	0,040357143	0,073928571	0,005357143		0,011785714	0,059642857	0,038214286	0,085
RF_030	1	62,1	150	1	1,394117647	1,711764706	0,141176471	0,085882353	0,177058824	0,021176471		0,016470588	0,072352941	0,055882353	0,155294118
RF_031	1	57	60	1	1,265	0,56	0,1335	0,044	0,1965	0,011		0,0215	0,1015	0,094	0,1415
RF_033	1	64,1	105	1	1,6575	0,655	0,09125	0,032	0,4025	0,0075	0,0115	0,008	0,036	0,01725	0,08125
RF_034	1	24	120	1	0,558823529	0,190882353	0,033529412	0,011764706	0,042647059					0,017058824	0,054705882
RF_036	1	63	165	1	3,25	0,7925	0,13025	0,048	0,11225	0,01025	0,017	0,01	0,04175	0,01525	0,05975
RF_037	0	23	180	1	1,144444444	0,314444444	0,065555556	0,029444444	0,231666667				0,060555556	0,042222222	0,094444444
RF_038	1	20	480	1		0,311	0,05	0,017	0,081666667	0,006		0,009666667	0,047666667	0,039666667	0,096
RF_039	1	20,2	120	1		0,244	0,05	0,02	0,194	0,008333333	0,012666667	0,008666667		0,02	0,057333333
RF_040	0	20,8	10	1	1,025	0,49	0,1325	0,0425	0,2825	0,0115	0,02			0,0255	0,081
RF_041	1	18,5	30	1	0,615	0,1765	0,0635	0,03675	0,685	0,00775	0,012	0,00675	0,03275	0,0255	0,05275
RF_042	1	20	20	1	5,65	1,28	0,1575	0,05925	0,1405	0,012	0,03075	0,01375	0,06525	0,0475	0,07025
RF_043	1	66,5	135	1		0,695	0,065	0,0245	0,18525	0,00775	0,01475	0,00825	0,0335	0,03625	0,0615
RF_044	0	19,4	480	1		0,415	0,165	0,077	0,559	0,027	0,077	0,039	0,122	0,063	0,115
RF_045	0	18,1	240	1	1,485714286	0,654285714	0,189142857	0,085428571	0,785714286	0,010857143	0,021142857	0,012285714	0,058571429	0,059142857	0,078
RF_046	1	18,4	120	1	1,6975	0,4425	0,0655	0,0345	0,08125	0,006	0,01275	0,01075	0,04225	0,023	0,07425
RF_047	0	18,8	120	1	1,555	0,325	0,066	0,02275	0,06875	0,009	0,01425	0,009	0,0365	0,03525	0,062
RF_048	1	18,1	300	1	1,9975	0,505	0,083	0,0305	0,118	0,0075	0,01275	0,00875	0,04275	0,044	0,09375
RF_049	1	19,8	300	1	1,2025	0,51	0,20225	0,1105	1,79	0,01875	0,0255	0,0145	0,03575	0,02975	0,06825
RF_051	1	18	180	1	1,5125	0,455	0,11	0,02525	0,26	0,00575	0,02075	0,00975	0,04125	0,023	0,06075
RF_052	1	18,9	240	1	2,1	0,65	0,153	0,038	0,44	0,00725	0,0135	0,009	0,04025	0,022	0,05925
RF_053	0	22	10	1	0,706666667	0,556666667	0,137333333	0,047333333	0,298333333	0,009333333	0,017666667			0,02	0,063666667
RF_054	0	20,7	120	1	1,0775	0,655	0,16525	0,084	1,3125	0,017	0,022	0,01175	0,0395	0,04925	0,08125
RF_055	0	20,7	480	1	1,96	0,4675	0,0875	0,04175	0,265	0,014	0,01975	0,009	0,036	0,03175	0,069
RF_056	0	18	480	1	0,7475	0,17325	0,10825	0,03775	0,385	0,00425	0,01125	0,0105	0,05025	0,043	0,09225
RF_057	1	22	270	1	1,315	0,69	0,1025	0,03525	0,132	0,01625	0,02	0,01125	0,0315	0,0255	0,062
RF_058	0	18,8	240	1	0,675	0,428571429	0,092857143	0,057142857	0,201071429	0,014642857	0,022857143	0,015357143	0,037857143	0,026071429	0,065357143
RF_059	0	31,7	20	1	1,615	0,8625	0,17075	0,06275	0,2575	0,02425	0,02225	0,01125	0,034	0,02925	0,06
RF_060	1	21	60	1	1,2	0,38	0,04425	0,0215	0,07325	0,00675	0,01475	0,01175	0,0755	0,08575	0,10625
RF_061	1	18,9	240	1	1,2625	0,31	0,03275	0,0165	0,1245		0,01125		0,02675	0,0155	0,0665
RF_062	1	20,8	120	1	1,0125	0,23825	0,04575	0,015	0,18275	0,0045	0,011		0,03075	0,01475	0,06375
RF_063	1	63,3	90	1		0,576	0,0776	0,0284	0,2164	0,0096	0,0164			0,0228	0,0744
RF_065	1	58,7	150	1	1,92	0,732	0,0976	0,0392	0,412	0,0104	0,0156	0,0132	0,0524	0,0216	0,0764
RF_066	0	19,2	10	1	4	1,17	0,335	0,118	1,545	0,02975	0,03825	0,01325	0,03925	0,02925	0,06975
RF_067	0	18,2	180	1	1,01	0,305	0,0555	0,0255	0,108	0,0095	0,01375	0,00825	0,0305	0,01525	0,064
RF_069	1	23,7	60	1	3,948717949	0,743589744	0,162051282	0,054615385	0,266666667	0,008974359	0,023076923	0,013076923	0,063589744	0,042051282	0,072820513
RF_070	1	69,4	180	1	1,745	1,6725	0,06175	0,0225	0,09575	0,0205	0,0135	0,00725	0,02825	0,016	0,0595
RF_071	1	55,3		1	4,1	0,885	0,22625	0,09625	0,615	0,0135	0,02575	0,01125	0,04925	0,0285	0,07575
RF_072	1	46,4	180	1	1,4775	0,5075	0,13375	0,07125	0,23725	0,00975	0,01975	0,012	0,06275	0,08725	0,08975
RF_073	1	22,4	120	1	2,24	1,375	0,10625	0,04	0,505	0,02025	0,01675	0,0125	0,05375	0,0485	0,07975
RF_074	1	27,3	180	1		0,985	0,06425	0,024	0,24925	0,02175	0,01275	0,0075		0,01725	0,064
RF_075	1	18,2	30	1	0,745	0,2095	0,049	0,018	0,06125		0,014	0,0065	0,04	0,03625	0,08525
RF_076	1	20,3	120	1	3,1	0,735	0,0925	0,04225	0,505	0,01	0,01425	0,019	0,04025	0,02375	0,06125
RF_078	0	25,6	240	1	1,195	0,71	0,15275	0,06125	0,7675	0,0105	0,019	0,0105	0,0445	0,0285	0,08875
RF_079	0	24	10	1	0,576923077	0,443589744	0,124102564	0,057179487	0,425641026	0,008461538	0,020512821	0,011282051	0,036410256	0,05974359	0,078717949
RF_080	0	22,7	240	1	1,9825	0,7325	0,3625	0,13825	0,8325	0,03725	0,035	0,0115	0,0295	0,022	0,07025
RF_081	0	20,8	180	1	1,945	0,79	0,265	0,0955	1,295	0,0145	0,02775	0,00975	0,03075	0,03175	0,0625
RF_082	1	23,5	120	1	1,78	0,3525	0,0665	0,04075	0,0895	0,01075	0,014	0,013	0,04975	0,0495	0,06925
RF_083	1	57,1	180	1	1,35	0,68	0,11775	0,05475	0,18825	0,01	0,01725	0,00975	0,0395	0,0355	0,07475
RF_084	1	25,8	240	1	1,3175	0,4675	0,058	0,024	0,0685	0,007	0,014	0,00925	0,04175	0,0395	0,06125
RF_085	1	30,2	30	1	0,775	0,3975	0,04825	0,02525	0,02575	0,00925	0,0105	0,0095	0,0415	0,03875	0,08625
RF_086	1	33,5	180	1	1,17	0,29	0,05525	0,02125	0,05775	0,00425	0,00975	0,00625	0,0295	0,02025	0,05525
RF_087	0	18,7	240	1	1,5375	0,5025	0,24725	0,11025	1,3575	0,0185	0,03	0,021	0,033	0,0275	0,07375
RF_088	0	18	10	1	1,17	0,5175	0,153	0,064	0,565	0,01	0,0185	0,00875	0,0295	0,01875	0,064
RF_089	0	18,3	180	1	0,43	0,705	0,132	0,05275	0,41	0,0165	0,02825	0,013	0,03375	0,0445	0,0755
RF_090	1	19,2	15	1	1,715	0,353	0,0965	0,035	0,355	0,008	0,0215	0,012	0,048	0,0385	0,092
RF_091	0	19,6	240	1	3,4	0,7	0,16275	0,0515	0,32	0,0105	0,01325	0,0095	0,04525	0,04825	0,07925
RF_092	0	18,5	10	1	1,0075	0,7575	0,21975	0,111	1,0075	0,01575	0,0245	0,00725	0,029	0,0245	0,06825
RF_093	0	18,4	240	1	1,3425	0,555	0,215	0,0625	0,51	0,0145	0,02325	0,01775	0,055	0,0585	0,08675
RF_094	0	19,4	180	1	0,8175	0,68	0,13325	0,05	0,4675	0,01825	0,0235	0,00875	0,029	0,021	0,062
RF_096	1	18,5	10	1	0,995	0,2725	0,024	0,009	0,025	0,004			0,0295	0,0165	0,053
RF_097	1	18,7	270	1	2,275	1,02	0,0905	0,039	0,1255	0,015	0,01775	0,0105	0,034	0,02675	0,05325
RF_098	0	19,2	60	1	0,7525	0,21675	0,102	0,048	0,22325	0,006	0,01275	0,01075	0,05775	0,07625	0,0925
RF_099	0	45,4	5	1	0,4125	0,3925	0,0635	0,0155	0,06175	0,01175	0,0125	0,008		0,0235	0,042
RF_100	0	20,2	150	1	0,8225	0,7925	0,34	0,24575	1,49	0,0145	0,03	0,0095	0,03075	0,02375	0,0765
RF_101	1	18,5	180	1	2,3625	0,945	0,1165	0,0575	0,2525	0,01	0,01525	0,01425	0,07475	0,067	0,07975
RF_102	0	21	180	1	0,875	0,4475	0,1145	0,05525	0,189	0,011	0,0185	0,0125	0,04575	0,062	0,082
RF_103	1	69	180	1	0,7675	0,6825	0,18125	0,05025	0,47	0,00775	0,01575	0,00575	0,0225	0,0145	0,053
RF_104	1	23	10	1	0,715	0,36	0,10925	0,03725	0,525	0,01025	0,0175	0,00975	0,03675	0,0395	0,06
RF_105	1	21	120	1	0,81	1,345	0,09	0,04175	0,2025	0,03025	0,01775	0,01325	0,05375	0,07525	0,083
RF_106	1	19	60	1	0,865	0,355	0,06325	0,02225	0,08025		0,012	0,00925	0,03625	0,03475	0,05825

## Sheet: Amino Acids
Sample	Sex	Age	Fasting time (min)	0 = self-induced 1=menthol	Ala	Arg	Asn	Asp	Cit	Gln	Glu	Gly	His	Ile	Leu	Lys	Met	Orn	Phe	Pro	Ser	Thr	Trp	Tyr	Val
RF_001	1	20,2	120	0	33,66666667	31,03333333	5,133333333	24,26666667	8,633333333	13,83333333	22,7	60	24,5	5,866666667	7,533333333	6,866666667	0,703333333	22,3	4,4	9,6	93,66666667		7,466666667	4,966666667	9,133333333
RF_002	1	18,7	5	0	13,45	14,825	2,75	8,2	5,6	14,175	15,025	24,35	8,5	1,6875	2,255	4,025	0,22975	6,625	1,15	11,35	35,75	11,75	1,4825	1,7175	3,525
RF_003	1	48	60	0	88	46,75	12,6	31,5	20,9	103	39,5	143,75	34,25	12,625	16,325	31,75	2,0825	22,025	7,45	35,5	128,75	41,75	4,925	10,175	33,75
RF_005	1	28,6	120	0	2,625											1,35	0,107	4,55	0,8575				1,12	0,405	0,845
RF_007	0	19	480	0	27,25	14,725	3,075	13	10,175	8,2	18	39	10,875	3,175	4,2	4	0,4375	10,025	1,77	6,7	62,75	15,75	1,5975	2,85	5,75
RF_008	1	36,1	210	0	2,725	2,135	0,57	1,4025		6,225	4,9	5,4	0,625		1,6125	2,0425	0,23025	2,24	0,825	5,3	5,075	2,55	0,4275	0,3775	0,7925
RF_010	1	20,5	120	1	5,3	8,575	0,8	5,3	2,95	7,125	15,825	12,2	3,45		1,74	1,3325	0,1205	1,7775	0,955	4,825	17,225	3,475	1,035	0,77	1,765
RF_011	1	66,2	210	1	40	47,55813953	5,906976744	34,18604651	10,51162791	21,97674419	36,27906977	77,09302326	20,11627907	5,941860465	6,976744186	8,069767442	0,65	24,88372093	3,453488372	11,39534884	134,8837209	28,60465116	3,662790698	5,825581395	11,86046512
RF_014	1	20,7	60	1	5,1	6,9	1,0975	5,25	1,34	10,05	16,35	12,3	3,275		2,09	3	0,19375	3,175	1,295	6,075	12,25	3,5	0,85	0,7725	1,8375
RF_015	1	70	60	1	5,306666667	2,886666667	0,833333333	4,793333333	2,086666667	9,866666667	14,13333333	10,8	1,533333333			1,593333333	0,091333333	5,16	0,693333333	10,53333333	10,46666667	4,766666667	0,502666667	0,460666667	1,18
RF_016	1	60,7	150	1	50,10869565	64,13043478	7,880434783	33,26086957	10,16304348	28,9673913	33,20652174	85,32608696	28,15217391	8,532608696	10,81521739	11,73913043	1,402173913	22,17391304	4,369565217	15,48913043	135,8695652	34,34782609	4,652173913	7,717391304	14,7826087
RF_017	1	26	240	1	73,5	40,25	9,725	36,25	35,25	23,925	41,5	129,25	38,25	10,2	11,95	11,125	1,1675	26	5,9	16,375	167,5	42	6,4	8,25	18,525
RF_019	1	21	180	1	17,6	16,5	3,325	17,75	8,3	14,725	32	37,5	12,575	3,85	5,425	6,65	0,635	14,85	2,575	9,9	54,75	12,85	1,995	3,775	6,525
RF_021	1	68	150	1	18,2									3,895	8,55	10	0,595	15,1	4,58				2,43	3,335	6,8
RF_022	1	63	150	1	49	34	8,433333333	31,36666667	24,3	28,53333333	45,33333333	117,3333333	34,33333333	9,2	12,7	10,8	0,873333333	16,76666667	5,966666667	21,4	146,6666667	31,86666667	4,1	6,1	14,96666667
RF_023	1	67,5	150	1	23,2	12,325	3,975	14,225	6,425	49,5	27,75	52,5	11,15	2,2775	3,6	9,45	0,3975	16,875	1,5375	30	44	15,375	1,375	2,65	6,7
RF_024	1	24,6	60	1	11,175	11,225	2,0225	12,05	3,925	16,8	20,85	22,3	5,625	1,5275	3,1	3,95	0,2775	4,25	1,2275	10,375	26,5	7,575	1,12	1,4825	3,5
RF_025	1	65	180	1	22,9	15,5	5,075	8,15	2,335	56,75	22,475	37,25	6,65	4,575	6,625	24,625	1,0525	15,225	1,835	25	22,125	17,075	0,99	2,775	11,975
RF_027	0	63,7	255	1	61,17241379		9,586206897							7,793103448	11,10344828	12,06896552	1,489655172	37,79310345	6,048275862	22	141,3793103		6,006896552	7,862068966	15,51724138
RF_028	1	22	255	1	54,5	42,25	5,125	18,875	10,25	16,95	38,5	86	20,8	7,475	8,25	10,175	0,9275	23,25	4,55	15,65	120,25	30,25	4,475	7,025	13,425
RF_029	1	22,8	60	1	40,35714286									6,25	7,035714286	20,53571429	1,267857143	15,32142857	3,485714286				2,042857143	4,928571429	15,92857143
RF_030	1	62,1	150	1	81,17647059		14,11764706							19,05882353	22	23,94117647	3,758823529	46,58823529	11,76470588	29,94117647	220		10,11764706	15,64705882	29,17647059
RF_031	1	57	60	1	90		11,4							11,75	11,15	15,45	1,515	48,3	6,15				7,4	11,8	20,9
RF_033	1	64,1	105	1	8,25	6,7	1,9525	8,35	3,875	15,325	15,425	14,775	3,4		1,3825	4,375	0,2775	6,45	0,735	12,75	19,225	6,7	0,5	0,94	1,98
RF_034	1	24	120	1	3,441176471	2,758823529	0,479411765	2,761764706	0,526470588	4,647058824	9,323529412	6,352941176	1,208823529			0,817647059	0,084705882	2,344117647	0,4	3,764705882	7,441176471	2,005882353	0,302941176	0,338235294	0,776470588
RF_036	1	63	165	1	26,75	15,725	5,675	11,875	3,925	45	25,75	45,25	5,9	2,85	4,625	15	0,5725	13,475	1,995	23,5	26,75	15,175	1,03	3,05	8,475
RF_037	0	23	180	1	15,05555556		2,155555556	11,22222222				33,44444444	7,277777778			3,827777778	0,333333333	5,611111111	1,533333333	10,72222222	44,33333333	10,22222222	1,411111111	2,15	4,277777778
RF_038	1	20	480	1	12,63333333	14,76666667	2,593333333	8,566666667	4,166666667	8,666666667	13,73333333	26,43333333	7,3	2,37	3,466666667	3,566666667	0,383333333	6,866666667	2,393333333	5,533333333	35,33333333	8,1	3,933333333	2,226666667	3,833333333
RF_039	1	20,2	120	1	6,333333333	6,1	1	7,8		3,8	20	9,933333333	2,076666667			1,41	0,139666667	2,543333333	1,076666667	3,666666667	15,26666667	5,666666667	1,216666667	0,7	1,376666667
RF_040	0	20,8	10	1	17,35	11,05	3,145	11,9	5,7	16,9	28,95	21,7	7	3,385	9,25	10,35	1,03	8,3	5,8	9,8	32,45	10,4	2,31	3,07	5,35
RF_041	1	18,5	30	1	25,5	21,95	4,325	12,55	3,35	17,4	28	43,75	15,125	5,3	6,325	8,35	0,9925	25	3,55	10,725	67,75	15,825	3	5,125	8,275
RF_042	1	20	20	1	99,25	67,5	16,05	61,25	36,25	78,25	81,75	169,5	43,5	13,525	15,5	27,5	2,095	42,5	8,325	40,25	212,75	63	7,65	13,575	31,25
RF_043	1	66,5	135	1	4,175	5,35	0,7575	5,15	2,5	3,925	9,05	8,6	1,72			1,145	0,104	4,15	0,61	3,275	12,725	3,825	0,8325	0,6625	1,17
RF_044	0	19,4	480	1	13,2	17,9	2,44	10,1	3,28	5,91	16	28,5	7,27			2,76	0,239	7,5	1,72	4,39	41	9,83	3	1,99	3,47
RF_045	0	18,1	240	1	71,71428571	43,14285714	8,628571429	35,14285714	23,6	34,85714286	66,57142857	115,1428571	32,28571429	10,02857143	12,62857143	13,11428571	1,565714286	38,28571429	6,514285714	22,25714286	153,7142857	41,42857143	6,114285714	9	17,97142857
RF_046	1	18,4	120	1	50	42,5	5,625	20,8	13,8	24,2	32,25	82,25	23,675	7,9	8,15	9,675	1,0125	22,5	4,475	22,875	108,75	29,75	4,475	6,675	13,3
RF_047	0	18,8	120	1	29	24,225	3,625	13,675	5,35	21,025	34,5	45	13,425	4,375	6,35	7,125	0,735	13,4	3,025	15,725	58,25	15,525	2,43	3,775	7,375
RF_048	1	18,1	300	1	43,25									7,2	7,5	11,15	0,9725	61,75	3,825				4,6	6,625	13,45
RF_049	1	19,8	300	1	41,5									7,8	9,4	9,35	1,1875	15,8	5,975				4,625	6,35	12,775
RF_051	1	18	180	1	22,075	20,675	3,3	11,025	6,85	27,75	23,05	38,25	13,225	3,775	5,275	7,875	0,6475	9,625	2,305	13,2	51,5	13,85	1,8075	3,1	7,575
RF_052	1	18,9	240	1	19,025	11,15	2,95	6,025	4,25	34	11,525	33,75	7,475	2,275	3,9	9,5	0,57	8,825	1,5525	16,125	33,75		1,1375	2,4175	6,5
RF_053	0	22	10	1	20,46666667		2,54							2,926666667	4,1	4,633333333	0,543333333	13,26666667	2,466666667	8	51,33333333		2,57	3,566666667	5,6
RF_055	0	20,7	480	1	5,7	6,95	1	6,85	1,305	8,3	17,125	15,8	1,6		1,8525	2,675	0,305	2,395	1,2325	5,275	11,1	5,05	0,6375	1,4875	2,02
RF_056	0	18	480	1	15,55	8,125	1,61	8,225	4,775	8,925	22,275	38,25	4,725	2,3575	2,9	3,6	0,4125	11,05	1,39	8,575	38,5	9,45	1,3575	2,37	4,65
RF_057	1	22	270	1	25,5	31,5	3,85	20,7	8,525	11,05	25,5	45,5	17,225	4,6	5,825	5,7	0,7175	8,775	2,65	7,975	74	19,225	2,775	4,2	8,05
RF_058	0	18,8	240	1	73,57142857	73,92857143	7,857142857	21,67857143	26,92857143	14,10714286	38,92857143	102,8571429	38,92857143	11,92857143	15,71428571	12,28571429	1,925	13,89285714	8,464285714	15,21428571	167,1428571	43,57142857	8,321428571	11,14285714	19,21428571
RF_059	0	31,7	20	1	5,05	6	0,8075	3,675	0,9	10,425	12,1	9,225	1,6425		1,37	3	0,182	3,45	0,7025	6,525	8,525	3,175	0,4575	0,5575	2,18
RF_060	1	21	60	1	55	39,25	7,675	24,375	7,05	43,25	40	101,75	24,525	8,2	8,4	15,15	0,98	33,5	4,5	25,75	125,75	33	4,375	7,625	15,5
RF_061	1	18,9	240	1	42,75	35,5	4,65	12,2	8,9	14,25	24,95	50,5	18,175	7,625	8,725	7,85	1,0225	15,675	4	14,2	87,75	23,35	3,5	5,4	11,775
RF_062	1	20,8	120	1	5,05	4,2	1,1325	5,45	0,7175	12,175	21,275	11,325	1,8			3	0,14625	2,37	0,485	9,375	7,275	3,2	0,45	0,55	1,85
RF_063	1	63,3	90	1	1,86	2,524	0,2512	1,504	0,416	2,056	3,452	5,16	1,232			0,468	0,0764	1,628	0,3076	1,988	5,12	1,176	0,86	0,21	0,536
RF_065	1	58,7	150	1	13,96	11,76	3,952	10,72	5,48	30,56	20,96	32,12	10,48	2,084	5,52	9	0,548	11,76	2,572	15,4	36	11,92	1,724	2,42	4,44
RF_066	0	19,2	10	1	46	39,25	5,6	24,525	10,9	18,625	43,25	76	22,925	8,05	10,125	11,15	1,2625	20,8	5,65	15,725	106,25	27,5	4,325	7,275	13,25
RF_067	0	18,2	180	1	114,75									17,7	20,65	22,6	3,225	49,75	10,275		243,5		9,975	16,275	30,25
RF_069	1	23,7	60	1	50	35,12820513	6,974358974	20,1025641	15,23076923	59,74358974	39,48717949	81,28205128	25,15384615	11,02564103	13,84615385	24	1,935897436	16,15384615	5,974358974	32,82051282	88,97435897		3,512820513	8,205128205	25,17948718
RF_070	1	69,4	180	1	12,425	12,4	2,4275	8,725	2,925	14,5	18,775	19,225	9,325	2,13	3,775	5,475	0,4875	9,575	1,5725	8,85	27,75	9,725	1,2325	2,095	4,05
RF_071	1	55,3		1	62,5									9,525	10,725	26,75	1,7575	18,25	5,525				4,3	8,8	20,225
RF_072	1	46,4	180	1	118	80,25	18,15	60	51,75	50,25	84	202,25	80,5	19,85	22,1	29,5	3,2	71,25	13,5	43	270	74	16,475	20,9	34,75
RF_073	1	22,4	120	1	40,75									7,675	8,975	13,35	1,16	19,125	4,4				2,55	5,725	14,725
RF_074	1	27,3	180	1	5,375	5,7	0,835	3,95	2,85	3,325	7,075	10,2	3,2			1,235	0,1135	2,18	0,585	2,405	15	3,475	0,605	0,7825	1,37
RF_075	1	18,2	30	1	12,2	11,8	1,5925	8,075	3,225	11,675	22,7	26,75	5,9	1,7225	3,35	3,625	0,4275	6,15	1,245	9,75	30,5	8,15	1,0925	1,5375	3,625
RF_076	1	20,3	120	1	22,975									1,9975	2,675	9,225	0,5725	5,925	1,375				0,8775	2,235	5,85
RF_078	0	25,6	240	1	19,325	11,225	2,675	11,025	5,05	14,175	24,875	35,25	7,725	2,525	3,325	5,15	0,41	14,025	1,875	11,275	48	12,475	1,915	2,6	5,125
RF_079	0	24	10	1	162,3076923	106,6666667	21,33333333	84,1025641	76,15384615	57,43589744	93,84615385	250,5128205	82,56410256	24,61538462	32,82051282	34,87179487	2,476923077	54,87179487	13,46153846	33,33333333	305,1282051	98,71794872	11,84615385	20,79487179	46,15384615
RF_080	0	22,7	240	1	51,75	40,75	9,35	42,5	36,25	30,5	49	98,75	41	9,075	10,35	12,5	1,385	23,9	6,275	16,725	156	36,25	5,575	9,875	17,775
RF_081	0	20,8	180	1	61,75	70	9,25	25,25	26,5	26,25	42,25	82,5	37	11,65	15,225	16,2	1,6275	14,5	9,625	19,5	131,5	39,5	11,05	10,65	19,425
RF_082	1	23,5	120	1	41,5	34,75	6,275	27,75	14,2	26,75	36,5	101,5	18,125	7,975	10,525	16,75	1,055	19,8	4,925	20,475	111,5	26,5	3,4	6,5	15,275
RF_083	1	57,1	180	1	21,8	32,25	5,35	21,225	9,125	22,825	32,25	41,5	22,075	3,725	4,65	8,025	0,7575	14,925	3,375	11,025	67,5	18,675	3,025	4,25	7,5
RF_084	1	25,8	240	1	13,175	9,1	2,625	11,75	5,3	18,75	26,5	28,75	5,8	1,46	1,0275	6,45	0,43	8,45	1,19	9,575	32	12,35	0,94	1,835	4,325
RF_085	1	30,2	30	1	63,5	118,5	11,45	49,5	27,75	32,5	49,25	122,25	47,5	14,7	18,275	18,95	2,155	14,175	11,675	20,675	171,75	47,25	10,4	13,225	24,225
RF_086	1	33,5	180	1	13,825	14,225	2,23	9,1	3,525	15,675	15,475	27,25	7,2	1,7075	0,8225	4,075	0,3275	5,85	1,4525	11,275	33,25	9,5	1,145	1,51	3,675
RF_087	0	18,7	240	1	93,25	87,5	13,55	46,5	31,75	24	53,75	168	60,5	17,925	22,575	23,95	2,725	36	12,65	24,125	224,75	54,5	9,375	17,425	30,75
RF_088	0	18	10	1	51,75	33	8,925	25,5	12,55	29,25	40,25	84	35	13,675	20,775	22	2,0275	42	10,275	34,75	119,5	31,25	9,25	10,825	21,05
RF_089	0	18,3	180	1	36,25	32,75	6,65	18,575	16,75	16,8	36	62,75	24,075	6,45	9,25	12,5	1,115	33,75	6,35	16,5	104,25	26,5	7,75	8,4	12,225
RF_090	1	19,2	15	1	54,5	36,8	7,45	31,6	6,45	24,3	46,05	85,5	12,05	23,5	57	44,35	2,53	13,65	26,95	28	82	25,7	6,25	6,65	33,9
RF_091	0	19,6	240	1	63	50	7,025	26,25	23,85	30,75	39,5	102,75	21,325	9,525	13,25	18,75	1,425	20,2	6,525	34	124	37,75	4,75	8,8	19,2
RF_092	0	18,5	10	1	34,25	27,75	5,175	18,725	6,7	18,525	34,75	62,25	18,8	8,65	13,15	13,5	1,1275	21	5,175	13,75	88,5	20,375	3,1	5,7	14,35
RF_093	0	18,4	240	1	180	150,75	32,25	121,25	97	119	152,5	322,5	128,75	38,5	50,5	54	5,25	80	26,75	48,25	365	121,25	23,525	33,5	65,5
RF_094	0	19,4	180	1	32,25	19,475	4,9	16,25	8,95	13,625	28,75	48	14,9	5,075	6,1	7,875	0,83	28	4,375	10,9	88,25	20,85	4,125	6,1	9,525
RF_096	1	18,5	10	1	6,85	6,525	1,09	6,225	0,78	7,825	17,175	11,125	1,4125	2,135	3,85	4,35	0,335	2,1375	1,4375	7,4	8,825	4,675	0,405	0,5125	3,175
RF_097	1	18,7	270	1	18,55	17,35	3,1	12,65	3,35	26,25	24,375	33,25	7,1	3,775	6,225	9,875	0,5075	6,175	2,4475	14,925	33,75	12,9	1,1075	1,94	7,9
RF_098	0	19,2	60	1	45,5	37	7,025	21,425	14,225	19,75	44,75	87,75	28	9,175	12,825	13,45	1,58	18,15	6,1	15,1	102,25	26	4,5	7,3	15,525
RF_099	0	45,4	5	1	34,25	28	4,025	17,85	13,8	10,675	21,925	49	8,675	6,125	8,85	9,2	0,67	11,225	4,8	11,35	73,25	21,525	3,575	4,25	10,675
RF_100	0	20,2	150	1	27,5	42,25	4	12,575	13,35	12,85	24,475	42	14,85	5,35	7,625	7,325	0,8175	7,225	5,875	8,1	74,75	17,675	6,675	5,1	8,575
RF_101	1	18,5	180	1	203,5	116,5	38,75	129,25	53,25	95	137,5	387,5	106,5	48,75	62,25	68,75	8,925	135,25	35,5	71,75	412,5	132,75	21,35	41	81
RF_102	0	21	180	1	62,5	53	9,15	33	21,525	22,625	42,5	128,5	34,5	11,8	16,2	17,75	2,0525	26,5	7,85	18,75	151,75	39	5,9	10,25	21
RF_103	1	69	180	1	19,75	18,1	3,55	14,75	12,75	9,4	14,95	35	14,65	4,25	5,925	6,4	0,625	4,7	2,775	6,175	57	13,375	1,825	2,8	7,225
RF_104	1	23	10	1	22,75	24,9	3,9	16,125	6,45	12,275	31,75	44,5	12,725	4,4	7,75	8,025	0,7025	10,275	5,1	10,425	55,25	15,875	2,4525	3,375	7,675
RF_105	1	21	120	1	80,75	79,75	10,45	38,75	50,75	21,5	49,5	145,5	47	13,625	18,15	19,15	1,61	20,5	12,7	20,7	198,25	51	12,15	14,625	25,5

## Sheet: Biogenic Amines
Sample	Sex	Age	Fasting time (min)	0 = self-induced 1=menthol	Ac-Orn	alpha-AAA	Creatinine	Putrescine	t4-OH-Pro	Taurine
RF_001	1	20,2	120	0	0,04	0,165333333	6,2	0,073333333	0,217	22,56666667
RF_002	1	18,7	5	0	0,0105	0,335	9,55	0,01375	0,6375	26
RF_003	1	48	60	0	0,0355	0,55	18,625	0,1245	0,96	124
RF_005	1	28,6	120	0			16,7	0,0105
RF_007	0	19	480	0	0,01275	0,20525	6,9	0,07025	0,0935	28
RF_008	1	36,1	210	0	0,00725	0,13575	10,75	0,0115	0,27	47
RF_010	1	20,5	120	1	0,0225	0,15	3,025	0,00775	0,091	82
RF_011	1	66,2	210	1			6,627906977	0,026744186	0,270930233	31,62790698
RF_014	1	20,7	60	1	0,023	0,2015	9,275	0,0415	0,2625	55,75
RF_015	1	70	60	1			6,933333333	0,118666667	0,993333333	64
RF_016	1	60,7	150	1	0,040217391		4,994565217	0,016847826	0,533152174	47,17391304
RF_017	1	26	240	1	0,04725	0,26	2,775	0,2925	0,0835	11,95
RF_019	1	21	180	1	0,02875	0,3825	4,475	0,055	0,14475	50,5
RF_021	1	68	150	1	0,0155		7,2	0,0195
RF_022	1	63	150	1	0,055	0,189	7,933333333	0,060666667	0,292	49,66666667
RF_023	1	67,5	150	1	0,01625	0,315	11,9	0,00625	0,7075	47
RF_024	1	24,6	60	1	0,00675	0,2725	2,95	0,009	0,194	43,75
RF_025	1	65	180	1	0,068	0,3175	13,875	0,0325	1,4575	57,25
RF_027	0	63,7	255	1			7,034482759	0,737931034		43,51724138
RF_028	1	22	255	1	0,04925	0,6	6,65	0,15125	0,5825	74,75
RF_029	1	22,8	60	1			13,03571429	0,134642857
RF_030	1	62,1	150	1			6,941176471	0,456470588
RF_031	1	57	60	1		0,29	9,75	0,0935
RF_033	1	64,1	105	1	0,02425	0,19875	13,125	0,0295	0,56	45,5
RF_034	1	24	120	1		0,163823529	2,858823529	0,014705882	0,137647059	31,17647059
RF_036	1	63	165	1	0,065	0,4475	11,2	0,13475	1,045	41
RF_037	0	23	180	1	0,023333333	0,513888889	6,333333333	0,047222222		27,27777778
RF_038	1	20	480	1	0,024666667	0,162666667	6,7	0,035666667	0,204	18
RF_039	1	20,2	120	1		0,336666667	3,733333333	0,017		47,66666667
RF_040	0	20,8	10	1	0,0175	0,54	5,85	0,1115	0,675	116,5
RF_041	1	18,5	30	1	0,01125	0,2525	2,7	0,03025	0,19575	29,75
RF_042	1	20	20	1	0,17775	0,425	16,45	0,216	1,7175	92,5
RF_043	1	66,5	135	1	0,007	0,10375	6,875	0,00625	0,05625	29,25
RF_044	0	19,4	480	1	0,053		6,79	0,097	0,247	25,1
RF_045	0	18,1	240	1	0,04	0,227714286	5,028571429	0,15	0,165428571	50,57142857
RF_046	1	18,4	120	1	0,06225	0,7225	7,05	0,16175	0,675	33
RF_047	0	18,8	120	1	0,01125	0,2385	6,55	0,04725	0,425	71
RF_048	1	18,1	300	1			6,25	0,09175
RF_049	1	19,8	300	1			3,05	0,0365
RF_051	1	18	180	1	0,034	0,4825	9,15	0,11	0,9225	50
RF_052	1	18,9	240	1	0,02075	0,2525	8,35	0,01375	0,5825	35,25
RF_053	0	22	10	1		0,144333333	5,5	0,013333333		15,73333333
RF_054	0	20,7	120	1	0,0675	0,31	7,8	0,18025	0,2575	27,25
RF_055	0	20,7	480	1		0,23125	4,925	0,005	0,194	44,75
RF_056	0	18	480	1	0,0065	0,1915	4,775	0,0085	0,45	36,25
RF_057	1	22	270	1	0,0075	0,23725	4,5	0,03225	0,1725	30
RF_058	0	18,8	240	1	0,022857143	0,235714286	3,678571429	0,125	0,155357143	21,14285714
RF_059	0	31,7	20	1	0,0065	0,28	7,475	0,0165	0,56	27,5
RF_060	1	21	60	1	0,03625	0,485	7,9	0,10625	0,915	31
RF_061	1	18,9	240	1	0,03375	0,37	5,65	0,037	0,455	41
RF_062	1	20,8	120	1		0,3425	5,675	0,01225	0,485	56,5
RF_063	1	63,3	90	1			6,44	0,0048	0,06	14,6
RF_065	1	58,7	150	1	0,0712	0,2624	9,44	0,016	0,492	94,4
RF_066	0	19,2	10	1	0,02025	0,625	8,75	0,11675	0,5925	90,5
RF_067	0	18,2	180	1			4,6	0,206
RF_069	1	23,7	60	1	0,08025641	0,969230769	10,58974359	0,264102564	1,317948718	48,71794872
RF_070	1	69,4	180	1	0,011	0,2075	8,275	0,0185	0,455	53,5
RF_071	1	55,3		1			13,925	0,0285
RF_072	1	46,4	180	1	0,161	0,41	9,65	0,3	1,25	36,5
RF_073	1	22,4	120	1			9,725	0,37
RF_074	1	27,3	180	1		0,1425	6,7	0,026	0,10725	17,775
RF_075	1	18,2	30	1	0,0125	0,3775	5,375	0,007	0,37	52,75
RF_076	1	20,3	120	1			10,175	0,021
RF_078	0	25,6	240	1	0,03475	0,24125	11,25	0,10225	0,4025	56
RF_079	0	24	10	1	0,047179487	0,261538462	3,820512821	0,641025641	0,38974359	37,94871795
RF_080	0	22,7	240	1	0,05825	0,3225	5,275	0,2155	0,2675	39,75
RF_081	0	20,8	180	1	0,03175	0,3875	6,8	0,07775	0,5575	47,5
RF_082	1	23,5	120	1	0,05925	0,3625	6,65	0,20275	0,4325	35,5
RF_083	1	57,1	180	1	0,01	0,1985	5,525	0,05575	0,38	60,25
RF_084	1	25,8	240	1	0,0055	0,2525	5,725		0,4375	53,75
RF_085	1	30,2	30	1	0,01625	0,18775	7,425	0,09125	0,5325	37,5
RF_086	1	33,5	180	1	0,019	0,1725	4,55	0,0415	0,4875	48
RF_087	0	18,7	240	1	0,0335	0,3275	4,275	0,08725	0,2675	36
RF_088	0	18	10	1	0,02325	0,229	6,05	0,07	0,895	19,725
RF_089	0	18,3	180	1	0,02775	0,0695	6,45	0,1225	0,16675	18,55
RF_090	1	19,2	15	1	0,0185	0,515	1,945	0,153	0,3255	94,5
RF_091	0	19,6	240	1	0,05175	0,24325	8,075	0,06175	0,72	56,25
RF_092	0	18,5	10	1	0,007	0,615	4,475	0,04925	0,4325	42,25
RF_093	0	18,4	240	1	0,03025	0,275	3,025	0,585	0,5425	45,75
RF_094	0	19,4	180	1	0,01225	0,25	4,225	0,102	0,2385	39,5
RF_096	1	18,5	10	1	0,0045	0,5075	6,425		0,21525	66
RF_097	1	18,7	270	1	0,00725	0,4125	7,5	0,11975	0,59	48,25
RF_098	0	19,2	60	1	0,02025	0,2425	5,45	0,07425	0,255	29
RF_099	0	45,4	5	1	0,01675	0,07075	6,425	0,0335	0,19075	9,85
RF_100	0	20,2	150	1	0,00625	0,345	4,2	0,028	0,114	15,425
RF_101	1	18,5	180	1	0,26	0,425	12,225	0,9025	0,825	68,25
RF_102	0	21	180	1	0,014	0,24175	4,725	0,083	0,585	28,75
RF_103	1	69	180	1	0,0035	0,124	4,425		0,08475	9,3
RF_104	1	23	10	1	0,00375	0,3125	3,75	0,069	0,21275	49,25
RF_105	1	21	120	1	0,03325	0,16525	3,725	0,08825	0,143	37,5
RF_106	1	19	60	1	0,04725	0,2525	4,175	0,0585	0,55	39,75

## Sheet: LysoPC
Sample	Sex	Age	Fasting time (min)	0 = self-induced 1=menthol	lysoPC a C14:0	lysoPC a C16:0	lysoPC a C16:1	lysoPC a C17:0	lysoPC a C18:0	lysoPC a C18:1	lysoPC a C18:2	lysoPC a C20:4
RF_001	1	20,2	120	0	9,333333333	40,33333333	0,353333333	0,636666667	5,2	6,466666667	1,136666667	0,048
RF_002	1	18,7	5	0	6,4	47,75	0,615	0,6925	6,4	10,6	1,225	0,063
RF_003	1	48	60	0	2,775	27	0,21775	0,485	3,85	4,45	1,0275	0,0805
RF_005	1	28,6	120	0	6,5	32,25	0,6425	0,5975	5,55	8,175	1,33	0,069
RF_007	0	19	480	0	7,175	26,5	0,24975	0,43	4,775	6,8	0,78	0,0505
RF_008	1	36,1	210	0	4,9	24,15	0,14975	0,3	5,075	4,35	0,9825	0,04425
RF_010	1	20,5	120	1	6,725	31	0,27	0,51	5,65	8,55	0,8925	0,055
RF_011	1	66,2	210	1	19,53488372	5,441860465	0,144186047			1,244186047	0,437209302	0,06744186
RF_014	1	20,7	60	1	7,425	29,5	0,29	0,47	4,05	5,175	0,755	0,035
RF_015	1	70	60	1	16,46666667	1,533333333				0,6	0,13
RF_016	1	60,7	150	1	10,16304348	3,114130435	0,072826087			1,211956522	0,188043478	0,023369565
RF_017	1	26	240	1	10,95	26,5	0,555	0,4025	2,775	7,6	1,3825	0,08575
RF_019	1	21	180	1	7,8	47,5	0,4275	0,705	6,4	8,425	1,1875	0,0785
RF_021	1	68	150	1	12	10,45	0,2805	0,2485	1,82	3,725	0,705	0,0545
RF_022	1	63	150	1	7,333333333	14,4	0,126666667	0,248666667	2,546666667	3,253333333	0,52	0,041666667
RF_023	1	67,5	150	1	6,85	21,125	0,2435	0,325	2,75	3,65	0,485	0,035
RF_024	1	24,6	60	1	7,25	72	0,8175	1,165	9,575	11,575	2,0875	0,0675
RF_025	1	65	180	1	6,4	32,25	0,3525	0,5225	4,25	5,6	0,845	0,044
RF_027	0	63,7	255	1	16,96551724	6,834482759	0,122068966		1,503448276	2,393103448	0,422068966	0,026206897
RF_028	1	22	255	1	6,2	91,75	0,7525	1,2875	15,175	20,125	3,025	0,139
RF_029	1	22,8	60	1	11,32142857	34,17857143	0,621428571	0,464285714	4,5	7,071428571	1,439285714	0,056071429
RF_030	1	62,1	150	1	17	4,805882353	0,095294118		1,464705882	1,482352941	0,243529412	0,027647059
RF_031	1	57	60	1	11,6	16,8	0,211	0,272	2,09	4,865	0,795	0,0425
RF_033	1	64,1	105	1	6,975	13,3	0,15	0,23825	2,4025	3,625	0,3825	0,03925
RF_034	1	24	120	1	9,264705882	14,88235294	0,198823529	0,272941176	2,223529412	2,155882353	0,423529412	0,017352941
RF_036	1	63	165	1	5,7	14,6	0,1925	0,225	2,0225	3,45	0,515	0,0235
RF_037	0	23	180	1	19,11111111	14,94444444	0,228333333	0,263888889	2,172222222	2,911111111	0,529444444	0,051666667
RF_038	1	20	480	1	8,7	47,66666667	0,436666667	0,736666667	7,333333333	7,933333333	1,39	0,066666667
RF_039	1	20,2	120	1	7,466666667	59	0,42	0,713333333	7,4	7,7	1,34	0,064333333
RF_040	0	20,8	10	1	14,75	10	0,1825	0,2345	2,3	3,305	0,675	0,091
RF_041	1	18,5	30	1	6,65	48	0,5075	0,5825	5,4	9,45	1,4025	0,06075
RF_042	1	20	20	1	8,175	78,5	0,9025	1,03	7,45	14,15	2,135	0,14325
RF_043	1	66,5	135	1	7,225	25	0,28	0,34	3,775	5,05	0,72	0,042
RF_044	0	19,4	480	1	33,9	30	0,368	0,562	4,37	4,15	0,658	0,058
RF_045	0	18,1	240	1	8,742857143	21,2	0,308571429	0,368571429	2,205714286	4,2	0,848571429	0,06
RF_046	1	18,4	120	1	5,825	46,5	0,995	0,6475	4,675	10,45	1,8275	0,092
RF_047	0	18,8	120	1	7,05	46,25	0,335	0,7025	5,8	7,65	1,2225	0,05475
RF_048	1	18,1	300	1	7,65	43,5	0,5275	0,6	4,35	10,225	1,9675	0,0755
RF_049	1	19,8	300	1	7,575	39	0,43	0,51	4,025	8,425	1,1825	0,069
RF_051	1	18	180	1	6,2	77,5	0,7925	1,165	9,475	10,35	1,6425	0,06675
RF_052	1	18,9	240	1	6,5	48,25	0,355	0,76	7,275	8,15	1,135	0,0545
RF_053	0	22	10	1	9,4	45,66666667	0,443333333	0,686666667	6,166666667	6,466666667	0,98	0,053333333
RF_054	0	20,7	120	1	11,025	21,7	0,325	0,3225	2,34	4,425	0,89	0,06525
RF_055	0	20,7	480	1	7,075	15,025	0,15575	0,212	2,44	3,475	0,5725	0,03775
RF_056	0	18	480	1	7,625	24,625	0,3325	0,3575	2,625	4,2	0,6525	0,0335
RF_057	1	22	270	1	7,975	26,5	0,2875	0,3725	3,4	6,625	0,875	0,043
RF_058	0	18,8	240	1	10,57142857	13,57142857	0,149285714	0,258928571	2,096428571	3,857142857	0,635714286	0,0475
RF_059	0	31,7	20	1	6,425	34,25	0,2235	0,4525	4,85	5,6	0,9525	0,04775
RF_060	1	21	60	1	7,275	36,25	0,53	0,4125	3,75	7,45	1,105	0,0655
RF_061	1	18,9	240	1	7,925	68,5	0,89	0,9275	8,175	10,475	1,695	0,10725
RF_062	1	20,8	120	1	6,425	71,75	0,7775	1,2925	10,075	12,55	1,5625	0,08725
RF_063	1	63,3	90	1	8,24	26,76	0,364	0,452	3,968	5	0,872	0,0512
RF_065	1	58,7	150	1	9,36	54	0,552	0,96	6,84	10,52	1,532	0,0668
RF_066	0	19,2	10	1	7,325	10,325	0,12225	0,154	1,495	2,775	0,6125	0,0575
RF_067	0	18,2	180	1	8,05	11,4	0,1615	0,14425	1,09	2,925	0,3725	0,03375
RF_069	1	23,7	60	1	6,102564103	55,64102564	0,497435897	0,846153846	7,153846154	7,820512821	1,574358974	0,102307692
RF_070	1	69,4	180	1	5,675	18,9	0,21425	0,226	2,675	2,85	0,45	0,0465
RF_071	1	55,3		1	5,45	47	0,595	0,8725	5,925	10,625	1,2675	0,06525
RF_072	1	46,4	180	1	7,225	36,75	0,635	0,6475	4,175	8,425	1,5225	0,07725
RF_073	1	22,4	120	1	5,15	38,5	0,305	0,495	4,5	5,9	0,995	0,038
RF_074	1	27,3	180	1	5,975	33,25	0,2825	0,485	5,65	5,9	0,7675	0,05825
RF_075	1	18,2	30	1	6,825	48	0,6925	0,75	6,725	12,55	1,5175	0,0655
RF_076	1	20,3	120	1	5,625	47	0,405	0,715	5,975	7,725	1,0125	0,05475
RF_078	0	25,6	240	1	4,7	37,25	0,3975	0,5825	4,95	6,225	1,0875	0,042
RF_079	0	24	10	1	8,333333333	18,28205128	0,282051282	0,307692308	3,794871795	2,641025641	0,694871795	0,105641026
RF_080	0	22,7	240	1	8,175	26,5	0,2225	0,395	3,5	5,4	0,8575	0,05575
RF_081	0	20,8	180	1	7,175	39,25	0,6625	0,4575	3,225	9,375	2,155	0,10425
RF_082	1	23,5	120	1	8,25	42,25	0,5975	0,625	4,55	8,375	1,14	0,05025
RF_083	1	57,1	180	1	7,05	17,1	0,18625	0,31	2,4225	3,85	0,6275	0,0325
RF_084	1	25,8	240	1	6,3	54,25	0,395	0,7825	8,025	9,275	1,5175	0,06525
RF_085	1	30,2	30	1	5,25	17,575	0,199	0,25	2,01	3,85	0,5725	0,04075
RF_086	1	33,5	180	1	3,45	48	0,3125	0,6125	5,7	5,9	1,3325	0,07025
RF_087	0	18,7	240	1	8,375	26	0,219	0,365	2,625	4,2	0,6875	0,05
RF_088	0	18	10	1	13,65	20,85	0,19175	0,315	2,55	3,35	0,6575	0,037
RF_089	0	18,3	180	1	7,1	57,75	0,5025	0,99	9,6	13,75	1,7475	0,117
RF_090	1	19,2	15	1	16,85	39,15	0,79	0,675	6,3	10,75	1,75	0,1155
RF_091	0	19,6	240	1	10	18,225	0,23125	0,23025	2,035	3,525	0,5325	0,047
RF_092	0	18,5	10	1	9,9	22,125	0,217	0,3025	2,75	4,3	0,76	0,04775
RF_093	0	18,4	240	1	9,45	17,2	0,1995	0,27	2,3125	3,25	0,7475	0,0455
RF_094	0	19,4	180	1	6,425	63,5	0,535	0,9925	7,375	10,5	1,47	0,066
RF_096	1	18,5	10	1	6,8	49,75	0,36	0,6825	6,85	7,7	1,0425	0,07475
RF_097	1	18,7	270	1	7	62,75	0,385	0,8	8,85	9,025	1,2925	0,06575
RF_098	0	19,2	60	1	8,425	27	0,3125	0,3875	2,8	4,65	0,875	0,0485
RF_099	0	45,4	5	1	9,4	14,25	0,1185	0,218	1,65	2,6	0,51	0,034
RF_100	0	20,2	150	1	11,825	25,5	0,355	0,45	2,4875	5,7	0,9025	0,08375
RF_101	1	18,5	180	1	7,55	30,25	0,33	0,4025	3,875	9,275	1,375	0,094
RF_102	0	21	180	1	9,3	7,05	0,096	0,11475	1,005	2,36	0,4575	0,04625
RF_103	1	69	180	1	3,575	16,6	0,207	0,27	2,2175	4,275	0,4425	0,03225
RF_104	1	23	10	1	6,825	38	0,435	0,51	5,95	9,95	1,7675	0,0475
RF_105	1	21	120	1	7,6	37,25	0,4	0,4775	5,025	10,3	1,4025	0,07225
RF_106	1	19	60	1	4,95	72,5	0,74	1,0425	8,325	10,05	1,7775	0,066

## Sheet: PC
Sample	Sex	Age	Fasting time (min)	0 = self-induced 1=menthol	PC aa C32:1	PC aa C34:1	PC aa C34:2	PC aa C34:3	PC aa C36:1	PC aa C36:2	PC aa C36:3	PC aa C36:4	PC aa C38:4	PC aa C38:5	PC aa C38:6	PC aa C42:1	PC ae C34:1	PC ae C34:2	PC ae C36:2
RF_001	1	20,2	120	0	0,037333333	0,403333333	0,686666667	0,024333333	0,099	0,270333333	0,234333333	0,090333333	0,027666667	0,021333333	0,026333333	0,011	0,045666667	0,028	0,033
RF_002	1	18,7	5	0	0,018	0,182	0,4975	0,02125	0,03975	0,15	0,18975	0,103	0,0345	0,02675	0,02325	0,00875	0,01675	0,00825	0,01625
RF_003	1	48	60	0	0,012	0,192	0,5875	0,01925	0,0935	0,19225	0,2015	0,105	0,034	0,03125	0,03025	0,012	0,00975	0,008	0,0215
RF_005	1	28,6	120	0	0,04275	0,395	0,85	0,0255	0,07625	0,43	0,3425	0,19475	0,0855	0,057	0,0445	0,0055	0,0305	0,01725	0,02725
RF_007	0	19	480	0	0,01375	0,17125	0,4875	0,019	0,042	0,1555	0,22925	0,08025	0,02725	0,02275	0,017	0,0065	0,014	0,00875	0,014
RF_008	1	36,1	210	0	0,045	0,9525	2,575	0,0525	0,2675	1,545	0,8375	0,455	0,22025	0,09875	0,14125		0,05275	0,0565	0,063
RF_010	1	20,5	120	1	0,018	0,2525	0,7075	0,027	0,06625	0,2625	0,355	0,12775	0,03025	0,035	0,02825	0,0045	0,01525	0,01125	0,02
RF_014	1	20,7	60	1	0,00725	0,14525	0,3375	0,01775	0,05675	0,12225	0,1355	0,048	0,023	0,01725	0,013	0,0055	0,01	0,00575
RF_015	1	70	60	1	0,040666667	0,358	0,347333333	0,027333333	0,15	0,283333333	0,192	0,056	0,027333333	0,018666667			0,045333333	0,029333333	0,040666667
RF_016	1	60,7	150	1		0,081521739	0,154891304		0,036413043	0,098913043	0,110326087	0,02826087				0,032608696
RF_017	1	26	240	1		0,075	0,10325		0,07425	0,0495	0,056	0,026	0,01175	0,0095	0,0155	0,0115
RF_019	1	21	180	1	0,01425	0,305	0,635	0,02025	0,0825	0,2675	0,2825	0,0885	0,0405	0,0305	0,02325	0,00525	0,01725	0,00875	0,0225
RF_021	1	68	150	1	0,038	0,465	0,52	0,021	0,1675	0,3365	0,2375	0,1075	0,0465	0,028	0,0445	0,018	0,042	0,029	0,0325
RF_022	1	63	150	1	0,051666667	0,813333333	0,703333333	0,023	0,336666667	0,57	0,301333333	0,157	0,071666667	0,038666667	0,032666667	0,014666667	0,166	0,103333333	0,147333333
RF_023	1	67,5	150	1	0,023	0,26	0,4975	0,0185	0,06225	0,207	0,171	0,1125	0,061	0,03125	0,038	0,0105	0,0185	0,0105	0,0155
RF_024	1	24,6	60	1	0,02	0,1425	0,7575	0,03	0,03075	0,20025	0,31	0,14125	0,0405	0,0355	0,025	0,0055	0,0115	0,01125	0,01875
RF_025	1	65	180	1	0,01975	0,285	0,7875	0,02275	0,0545	0,335	0,3625	0,12325	0,06125	0,042	0,0315	0,00725	0,01025	0,00825	0,02525
RF_027	0	63,7	255	1		0,148965517	0,196551724		0,106206897	0,122758621	0,096551724	0,026206897				0,01862069	0,039310345	0,023448276	0,032413793
RF_028	1	22	255	1	0,017	0,2625	0,6175	0,027	0,07225	0,23425	0,26	0,12475	0,03625	0,033	0,045	0,01275	0,02425	0,01225	0,0255
RF_029	1	22,8	60	1	0,025357143	0,214642857	0,496428571	0,0175	0,050357143	0,1925	0,171785714	0,081428571	0,033571429	0,017857143	0,0225	0,008928571	0,0175	0,014642857	0,019285714
RF_030	1	62,1	150	1	0,041176471	0,571764706	0,257058824		0,210588235	0,293529412	0,169411765	0,05	0,035294118	0,028235294	0,021176471	0,03	0,031764706	0,024117647	0,027647059
RF_031	1	57	60	1	0,016	0,18	0,4465	0,0195	0,0705	0,217	0,2385	0,0785	0,024	0,0235	0,024	0,0275	0,022	0,014	0,0235
RF_033	1	64,1	105	1	0,0205	0,18825	0,3225	0,01525	0,055	0,19325	0,17	0,0605	0,0325	0,0215	0,01675		0,01		0,01275
RF_034	1	24	120	1	0,008529412	0,155294118	0,305882353	0,017647059	0,073823529	0,113823529	0,115588235	0,050882353	0,022352941	0,015882353	0,012058824		0,009117647	0,006764706
RF_036	1	63	165	1	0,014	0,255	0,635	0,01925	0,064	0,26	0,285	0,09275	0,037	0,022	0,015	0,00575	0,011	0,00775	0,02125
RF_037	0	23	180	1	0,017777778	0,383333333	0,55	0,027777778	0,281666667	0,208333333	0,194444444	0,096111111	0,036111111	0,031111111	0,023888889	0,015555556	0,03	0,02
RF_038	1	20	480	1	0,059	1,236666667	1,356666667	0,025333333	0,336666667	0,92	0,503333333	0,204333333	0,107333333	0,053	0,039	0,01	0,156	0,101666667	0,136333333
RF_039	1	20,2	120	1	0,015	0,210666667	0,57	0,024	0,074333333	0,206666667	0,228	0,089	0,026333333	0,026	0,020666667	0,006666667	0,02	0,013	0,022666667
RF_040	0	20,8	10	1	0,05	0,8	1,765	0,045	0,2045	1,015	0,477	0,725	0,387	0,1385	0,181	0,0135	0,079	0,104	0,088
RF_041	1	18,5	30	1	0,01175	0,1515	0,2775	0,0145	0,075	0,09975	0,09875	0,04125	0,0135	0,0125	0,01375	0,00825	0,01175	0,008
RF_042	1	20	20	1	0,02225	0,13	0,5675	0,02975	0,0305	0,151	0,223	0,1115	0,03	0,0345	0,05475	0,01875	0,017	0,01225	0,01875
RF_043	1	66,5	135	1	0,0265	0,3	0,7125	0,022	0,068	0,3425	0,3225	0,09525	0,049	0,0395	0,0305	0,00525	0,0155	0,009	0,026
RF_044	0	19,4	480	1	0,037	0,294	0,635	0,044	0,162	0,201	0,259	0,099	0,046	0,04	0,038	0,017	0,043	0,031	0,047
RF_045	0	18,1	240	1		0,137142857	0,502857143	0,020857143	0,080857143	0,145714286	0,189714286	0,077142857	0,020857143	0,018	0,019714286	0,018	0,014285714	0,010571429	0,019142857
RF_046	1	18,4	120	1	0,01575	0,1145	0,31	0,02175	0,03575	0,108	0,14675	0,06175	0,019	0,01875	0,023	0,013	0,0125	0,01025
RF_047	0	18,8	120	1	0,014	0,17825	0,8475	0,028	0,0705	0,1925	0,2775	0,1245	0,03675	0,025	0,024	0,011	0,016	0,01475	0,02275
RF_048	1	18,1	300	1	0,0115	0,09325	0,3425	0,0105	0,02625	0,09975	0,15525	0,0635	0,02	0,01525	0,0325	0,03375	0,0085	0,006	0,01525
RF_049	1	19,8	300	1	0,01375	0,18625	0,5475	0,0245	0,059	0,1945	0,2625	0,1	0,03675	0,03175	0,0225	0,01225	0,01675	0,011	0,01575
RF_051	1	18	180	1	0,017	0,15775	0,6175	0,0255	0,04925	0,133	0,191	0,0955	0,029	0,02475	0,0265	0,0075	0,01225	0,0095	0,01925
RF_052	1	18,9	240	1	0,012	0,137	0,485	0,014	0,04	0,1825	0,23125	0,0825	0,02925	0,0205	0,0175	0,00975	0,01075	0,007	0,01575
RF_053	0	22	10	1	0,010333333	0,191	0,413333333	0,019	0,08	0,144333333	0,152	0,059666667	0,027666667	0,017333333	0,017	0,005666667	0,02	0,010333333	0,02
RF_054	0	20,7	120	1		0,03825			0,037						0,02175	0,03275	0,009	0,00525
RF_055	0	20,7	480	1	0,016	0,11975	0,3425	0,01825	0,05125	0,10025	0,15	0,05925	0,0185	0,01575	0,0115	0,007	0,012	0,00875	0,01275
RF_056	0	18	480	1	0,0105	0,0945	0,2525	0,01375	0,03525	0,06175	0,0925	0,04325	0,0145	0,01575	0,0105	0,0055	0,01125	0,00625
RF_057	1	22	270	1	0,00925	0,10825	0,3325	0,0135	0,04975	0,11225	0,14375	0,046	0,01325	0,01475	0,01225	0,0125	0,008	0,0055
RF_058	0	18,8	240	1	0,016071429	0,192142857	0,575	0,018214286	0,094642857	0,161785714	0,239285714	0,104285714	0,027857143	0,031071429	0,025	0,030357143	0,024285714	0,018214286	0,023928571
RF_059	0	31,7	20	1	0,01625	0,16675	0,65	0,01825	0,0485	0,14975	0,1885	0,09425	0,02375	0,02125	0,018		0,013	0,0115	0,015
RF_060	1	21	60	1	0,027	0,15675	0,48	0,027	0,02825	0,13925	0,2335	0,10125	0,03275	0,0285	0,0215	0,01	0,0125	0,006	0,0125
RF_061	1	18,9	240	1	0,01375	0,08075	0,2235	0,01775	0,0325	0,0685	0,08475	0,04175	0,01325	0,01775	0,018	0,014
RF_062	1	20,8	120	1	0,01175	0,1355	0,4325	0,0245	0,03775	0,12375	0,17625	0,07625	0,02325	0,026	0,01975	0,0045	0,01175	0,007	0,01675
RF_063	1	63,3	90	1	0,0188	0,1256	0,48	0,0236	0,0508	0,1376	0,1768	0,076	0,024	0,0208	0,0164
RF_065	1	58,7	150	1	0,0148	0,232	0,852	0,0216	0,0584	0,3516	0,424	0,1384	0,0608	0,0556	0,032	0,0076	0,0224	0,0152	0,0324
RF_066	0	19,2	10	1	0,011	0,0955	0,4925	0,019	0,03025	0,10425	0,17875	0,10375	0,022	0,0255	0,01775	0,01375	0,00925	0,00875	0,01175
RF_067	0	18,2	180	1		0,05475	0,084		0,036	0,04925	0,05575	0,01525	0,0105	0,009	0,01125	0,0225
RF_069	1	23,7	60	1	0,012051282	0,115641026	0,371794872	0,014871795	0,061025641	0,137692308	0,131794872	0,065641026	0,024615385	0,021538462	0,025384615	0,014615385	0,010512821	0,006153846	0,013589744
RF_070	1	69,4	180	1	0,0125	0,14075	0,385	0,0145	0,04925	0,13025	0,15	0,07425	0,0335	0,02325	0,01625	0,007	0,0075		0,012
RF_071	1	55,3		1	0,0175	0,126	0,295	0,01475	0,028	0,1235	0,13275	0,052	0,02075	0,01975	0,03075	0,0145	0,01075		0,01175
RF_072	1	46,4	180	1	0,009	0,09325	0,24075	0,0115	0,0365	0,09375	0,0995	0,0455	0,018	0,01625	0,02525	0,02075	0,014	0,007
RF_073	1	22,4	120	1	0,0115	0,11225	0,3825	0,01525	0,038	0,14175	0,158	0,05825	0,0245	0,01975	0,019	0,00925	0,00775		0,01175
RF_074	1	27,3	180	1	0,01925	0,2725	0,6375	0,02175	0,1115	0,21425	0,1935	0,1085	0,038	0,02575	0,02525	0,00425	0,0155	0,00925	0,015
RF_075	1	18,2	30	1	0,017	0,1265	0,3875	0,022	0,0345	0,1165	0,176	0,05575	0,015	0,0215	0,0145		0,01225	0,00725	0,012
RF_076	1	20,3	120	1	0,01575	0,17175	0,3875	0,013	0,038	0,1905	0,20475	0,06675	0,041	0,0265	0,024	0,0075	0,01275		0,01825
RF_078	0	25,6	240	1	0,01775	0,1925	0,655	0,0255	0,0475	0,19675	0,20775	0,088	0,0245	0,0195	0,02325	0,00675	0,01425	0,009	0,01675
RF_079	0	24	10	1		0,122307692	0,061538462		0,114871795	0,049487179	0,013333333	0,008205128	0,011282051		0,020769231	0,02025641	0,018205128	0,006666667	0,01
RF_080	0	22,7	240	1	0,012	0,178	0,8275	0,02775	0,079	0,18	0,32	0,13275		0,03075	0,0295	0,01475	0,015	0,01025	0,01775
RF_081	0	20,8	180	1		0,03775	0,11825		0,0245	0,04025	0,064	0,02675	0,009	0,011	0,017	0,02225		0,0035
RF_082	1	23,5	120	1	0,0165	0,12075	0,3925	0,016	0,044	0,11075	0,15125	0,058	0,01625	0,01575	0,01875	0,015	0,01225	0,00825	0,01175
RF_083	1	57,1	180	1	0,0245	0,1795	0,565	0,02425	0,0655	0,17225	0,2215	0,092	0,03125	0,025	0,02625	0,012	0,014	0,009	0,01525
RF_084	1	25,8	240	1	0,00925	0,13425	0,4375	0,01625	0,03925	0,177	0,18175	0,07325	0,0265	0,02125	0,022	0,00675	0,0095	0,00675	0,0135
RF_085	1	30,2	30	1	0,01325	0,179	0,6175	0,02	0,04975	0,17725	0,23225	0,09225	0,03525	0,02375	0,02325	0,02475	0,01325	0,00775	0,015
RF_086	1	33,5	180	1	0,013	0,115	0,4125	0,0175	0,04925	0,08375	0,11925	0,09275	0,0185	0,0195	0,01575	0,007	0,0105	0,00625	0,0115
RF_087	0	18,7	240	1		0,09025	0,3025	0,011	0,0365	0,07025	0,1065	0,049	0,0165	0,0105	0,018	0,02575	0,00725	0,0055	0,00775
RF_088	0	18	10	1	0,00775	0,0925	0,2875		0,05525	0,0795	0,09175	0,04475	0,016	0,0105	0,011	0,01525	0,01075	0,006	0,011
RF_089	0	18,3	180	1	0,03375	0,2575	0,8275	0,02675	0,05275	0,2775	0,375	0,1425		0,0435	0,0405	0,01175	0,0275	0,0145	0,0275
RF_090	1	19,2	15	1	0,035	0,3745	0,585	0,0215	0,12	0,3425	0,227	0,166	0,069	0,057	0,052	0,014	0,065	0,0495	0,0615
RF_091	0	19,6	240	1	0,0075	0,09075	0,204		0,0355	0,10875	0,1015	0,03775	0,01725	0,01375	0,0135	0,01075	0,0095	0,0085	0,0115
RF_092	0	18,5	10	1	0,00825	0,12425	0,44	0,01325	0,0505	0,16525	0,20775	0,07325	0,0325	0,0225	0,016	0,01025	0,00875	0,006	0,014
RF_093	0	18,4	240	1		0,10275	0,2925	0,00925	0,076	0,0975	0,1235	0,05		0,0145	0,01825	0,01875	0,0095	0,006	0,01025
RF_094	0	19,4	180	1	0,01225	0,15725	0,7225	0,025	0,047	0,15275	0,25	0,1065	0,028	0,02275	0,021	0,00925	0,01425	0,00725	0,01525
RF_095	0	57,6	10	1	0,006	0,1375	0,3375	0,012	0,0505	0,13525	0,142	0,06	0,02425	0,02075	0,01625	0,0075	0,00825	0,0065	0,011
RF_096	1	18,5	10	1	0,0265	0,4275	1,025	0,02975	0,092	0,4225	0,3825	0,3125	0,12725	0,0725	0,05625	0,00375	0,01925	0,01675	0,03125
RF_097	1	18,7	270	1	0,0075	0,13475	0,505	0,01575	0,03625	0,15125	0,17675	0,068	0,016	0,02225	0,02125	0,0075	0,009	0,00625	0,01225
RF_098	0	19,2	60	1	0,00675	0,07075	0,196	0,00975	0,032	0,084	0,08275	0,0395	0,0175	0,01625	0,01325	0,01075	0,008	0,00475	0,01
RF_099	0	45,4	5	1	0,004	0,10925	0,375	0,01075	0,05075	0,108	0,116	0,05825	0,015	0,011	0,0145	0,012	0,008	0,005	0,00925
RF_100	0	20,2	150	1		0,05575	0,113		0,037	0,0555	0,07725	0,02325	0,0105	0,0115	0,012	0,01475	0,00725	0,00475	0,008
RF_101	1	18,5	180	1	0,0045	0,078	0,138		0,04225	0,0895	0,09175	0,0295	0,0115	0,01025	0,01975	0,01925	0,01475	0,01075	0,01275
RF_102	0	21	180	1	0,01075	0,0985	0,3175	0,013	0,037	0,0845	0,14225	0,0665	0,0175	0,01775	0,011	0,015	0,0105	0,0075	0,011
RF_103	1	69	180	1	0,00825	0,17	0,415	0,0095	0,03425	0,2145	0,22875	0,081	0,037	0,0345	0,01675	0,00575	0,008	0,0045	0,01275
RF_104	1	23	10	1	0,01075	0,122	0,33	0,0125	0,054	0,116	0,145	0,068	0,0155	0,01375	0,01475	0,00975	0,01225	0,009	0,01375
RF_105	1	21	120	1		0,0585	0,103		0,038	0,06525	0,066	0,02125	0,0115	0,01	0,0215	0,0185	0,01275	0,008	0,01325
RF_106	1	19	60	1	0,0085	0,10425	0,3875	0,01775	0,0295	0,14775	0,15975	0,06225	0,02275	0,02	0,04975	0,039	0,0075	0,00525	0,0135

## Sheet: SM
Sample	Sex	Age	Fasting time (min)	0 = self-induced 1=menthol	SM (OH) C14:1	SM (OH) C16:1	SM (OH) C22:1	SM (OH) C22:2	SM (OH) C24:1	SM C16:0	SM C16:1	SM C18:0	SM C18:1	SM C24:0	SM C24:1	SM C26:0
RF_001	1	20,2	120	0	0,039666667	0,016666667	0,021666667	0,011666667	0,009666667	0,613333333	0,044	0,05	0,012	0,086333333	0,071333333	0,009333333
RF_002	1	18,7	5	0	0,02875	0,0115	0,01175	0,0065	0,0065	0,41	0,053	0,041	0,01775	0,03725	0,04425	0,0015
RF_003	1	48	60	0	0,0325	0,00675	0,03175	0,009	0,00575	0,3525	0,02775	0,06475	0,01125	0,1245	0,04975	0,0035
RF_005	1	28,6	120	0	0,0385	0,01175	0,01875	0,013	0,004	0,5125	0,05775	0,055	0,0165	0,0565	0,067	0,00325
RF_007	0	19	480	0	0,027	0,006	0,015	0,0065	0,00475	0,365	0,04325	0,045	0,01375	0,06475	0,06225	0,0025
RF_008	1	36,1	210	0	0,03525	0,015	0,04025	0,022	0,0075	0,7075	0,0805	0,1155	0,04575	0,10275	0,11225	0,00175
RF_010	1	20,5	120	1	0,0255	0,01075	0,0195	0,01	0,0055	0,4025	0,0515	0,045	0,017	0,064	0,06125	0,00325
RF_014	1	20,7	60	1	0,0215	0,005	0,01675	0,006		0,265	0,03075	0,04375	0,01225	0,065	0,04125	0,0025
RF_015	1	70	60	1		0,013333333	0,042666667	0,011333333	0,018	0,446	0,025333333	0,064666667	0,010666667	0,148	0,08	0,011333333
RF_016	1	60,7	150	1			0,013043478	0,005978261		0,163586957	0,01576087	0,025	0,008152174	0,04673913	0,033152174	0,004347826
RF_017	1	26	240	1	0,022	0,0085	0,02925	0,011	0,00875	0,335	0,02775	0,0515	0,011	0,12975	0,0875	0,00525
RF_019	1	21	180	1	0,032	0,01225	0,03025	0,011	0,00925	0,48	0,046	0,0725	0,019	0,14425	0,0845	0,00575
RF_021	1	68	150	1	0,0405	0,017	0,0385	0,0135	0,02	0,595	0,058	0,0855	0,021	0,155	0,107	0,011
RF_022	1	63	150	1	0,054	0,025666667	0,051666667	0,016666667	0,018	0,906666667	0,048333333	0,110666667	0,019333333	0,196	0,181333333	0,01
RF_023	1	67,5	150	1	0,02275	0,00875	0,01525	0,008	0,00925	0,2925	0,0385	0,03925	0,0125	0,049	0,04275	0,002
RF_024	1	24,6	60	1	0,026	0,0055	0,01125	0,0065	0,0035	0,24025	0,038	0,03025	0,00875	0,038	0,02125	0,0035
RF_025	1	65	180	1	0,02275	0,007	0,016	0,00375	0,00425	0,3075	0,04075	0,04025	0,0145	0,051	0,03925	0,0025
RF_027	0	63,7	255	1		0,015862069	0,047586207	0,015172414	0,014482759	0,475862069	0,037241379	0,074482759	0,011724138	0,186206897	0,1	0,006896552
RF_028	1	22	255	1	0,0275	0,0075	0,01575	0,00775	0,00575	0,405	0,048	0,04575	0,01725	0,0465	0,04975	0,0025
RF_029	1	22,8	60	1	0,0225	0,007857143	0,012142857	0,006071429	0,005357143	0,3125	0,031428571	0,031785714	0,008214286	0,039642857	0,037857143	0,006071429
RF_030	1	62,1	150	1		0,016470588	0,036470588	0,013529412	0,018235294	0,611764706	0,044705882	0,080588235	0,019411765	0,144705882	0,077058824	0,015294118
RF_031	1	57	60	1		0,009	0,032	0,0115	0,0195	0,362	0,031	0,05	0,013	0,099	0,055	0,008
RF_033	1	64,1	105	1	0,018	0,00525	0,01625	0,00475	0,0055	0,295	0,02825	0,0415	0,01075	0,073	0,05125	0,00475
RF_034	1	24	120	1	0,020294118	0,006470588	0,026470588	0,007058824	0,007058824	0,269705882	0,023823529	0,049411765	0,009117647	0,122058824	0,051764706	0,004117647
RF_036	1	63	165	1	0,0165	0,005	0,01625	0,00725	0,0065	0,2475	0,028	0,04025	0,00975	0,09075	0,052	0,00225
RF_037	0	23	180	1	0,040555556	0,019444444	0,106666667	0,019444444	0,028888889	0,75	0,041666667	0,129444444	0,016111111	0,478333333	0,173333333	0,013888889
RF_038	1	20	480	1	0,045	0,020666667	0,044333333	0,02	0,013333333	0,91	0,043	0,106666667	0,016666667	0,145333333	0,135666667	0,013666667
RF_039	1	20,2	120	1	0,021333333	0,008666667	0,020333333	0,008	0,005666667	0,343333333	0,033333333	0,059333333	0,015333333	0,088	0,046666667	0,002
RF_040	0	20,8	10	1	0,037	0,0185	0,0485	0,0295	0,011	0,74	0,0835	0,1065	0,041	0,124	0,1535	0,0025
RF_041	1	18,5	30	1	0,01875	0,00675	0,027	0,009	0,0045	0,3125	0,024	0,051	0,00625	0,10425	0,07325	0,0035
RF_042	1	20	20	1	0,035	0,00825	0,009	0,0045	0,00525	0,435	0,064	0,0405	0,01625	0,03025	0,03525	0,002
RF_043	1	66,5	135	1	0,0255	0,0085	0,01925	0,0035	0,01075	0,475	0,05675	0,05025	0,01525	0,0765	0,05625	0,004
RF_044	0	19,4	480	1		0,022	0,044		0,017	0,535	0,058	0,08	0,014	0,219	0,093	0,015
RF_045	0	18,1	240	1	0,028	0,010285714	0,027142857	0,011714286	0,008	0,417142857	0,038285714	0,065714286	0,012571429	0,132285714	0,074857143	0,003142857
RF_046	1	18,4	120	1	0,01725	0,00525	0,01175	0,00675	0,00425	0,2725	0,04	0,0305	0,0075	0,058	0,0465	0,00275
RF_047	0	18,8	120	1	0,028	0,012	0,02425	0,01025	0,00825	0,4175	0,04575	0,062	0,01675	0,10375	0,0635	0,005
RF_048	1	18,1	300	1	0,021	0,0055	0,01025	0,00375	0,0075	0,295	0,03325	0,036	0,0115	0,03625	0,0475	0,002
RF_049	1	19,8	300	1	0,02375	0,00925	0,016	0,00775	0,00725	0,405	0,05425	0,05175	0,014	0,068	0,052	0,00275
RF_051	1	18	180	1	0,02275	0,01	0,02	0,0065	0,00675	0,345	0,04025	0,03725	0,01275	0,07275	0,0485	0,00325
RF_052	1	18,9	240	1	0,02275	0,0065	0,012	0,00775	0,0035	0,345	0,0355	0,03775	0,00875	0,04	0,03975	0,00325
RF_053	0	22	10	1	0,026666667	0,009666667	0,028	0,007666667	0,004666667	0,366666667	0,044666667	0,06	0,012	0,105	0,064	0,004333333
RF_054	0	20,7	120	1	0,0195	0,00725	0,017	0,00675	0,00675	0,3175	0,03725	0,03825	0,01225	0,06725	0,0395	0,0045
RF_055	0	20,7	480	1	0,024	0,00875	0,02175	0,00625	0,007	0,3225	0,03225	0,03875	0,01075	0,10475	0,0495	0,00575
RF_056	0	18	480	1	0,02325	0,00575	0,01575	0,00625	0,00625	0,27	0,0325	0,03675	0,0105	0,0645	0,037	0,002
RF_057	1	22	270	1	0,01475	0,005	0,01825	0,00625	0,0045	0,3025	0,036	0,0465	0,014	0,0835	0,04075	0,004
RF_058	0	18,8	240	1	0,025357143	0,008928571	0,032142857	0,011785714	0,007857143	0,425	0,041785714	0,062857143	0,019642857	0,1275	0,074642857	0,005714286
RF_059	0	31,7	20	1	0,0345	0,0085	0,01475	0,007	0,006	0,4175	0,03775	0,0435	0,0125	0,0605	0,0385	0,00225
RF_060	1	21	60	1	0,02475	0,0065	0,01	0,00275	0,00825	0,275	0,037	0,02875	0,01075	0,0375	0,02125	0,0045
RF_061	1	18,9	240	1	0,022	0,00625	0,017	0,00425	0,00325	0,31	0,03275	0,0335	0,0115	0,0605	0,0345	0,00225
RF_062	1	20,8	120	1	0,0245	0,0075	0,01475	0,00625	0,00375	0,295	0,043	0,0305	0,01325	0,05425	0,03875	0,00325
RF_063	1	63,3	90	1	0,0316	0,0044	0,0152	0,0068	0,0056	0,3544	0,0432	0,0376	0,0108	0,0608	0,0444	0,0028
RF_065	1	58,7	150	1	0,0284	0,0092	0,0172	0,008	0,0052	0,3628	0,0388	0,0488	0,0152	0,0472	0,0496	0,0024
RF_066	0	19,2	10	1	0,029	0,00575	0,0135	0,0055	0,00425	0,3325	0,042	0,02725	0,01075	0,052	0,03075	0,00175
RF_067	0	18,2	180	1		0,00375	0,0105	0,00425	0,00575	0,2255	0,0225	0,0305	0,008	0,06475	0,0425
RF_069	1	23,7	60	1	0,031025641	0,007179487	0,026923077	0,007179487	0,008461538	0,361538462	0,035641026	0,053846154	0,013076923	0,082564103	0,04974359	0,003333333
RF_070	1	69,4	180	1		0,0035	0,0135		0,00525	0,1845	0,0265	0,03325	0,00575	0,05175	0,0285	0,00375
RF_071	1	55,3		1	0,027	0,0055	0,01025	0,00475	0,008	0,285	0,0305	0,02425	0,00825	0,02875	0,03425	0,003
RF_072	1	46,4	180	1	0,0265	0,01025	0,019	0,00925	0,0095	0,3025	0,04225	0,04025	0,013	0,0475	0,041	0,00375
RF_073	1	22,4	120	1	0,016	0,003	0,01325	0,005	0,00675	0,24525	0,0215	0,03225	0,005	0,05525	0,03675	0,004
RF_074	1	27,3	180	1	0,038	0,013	0,03075	0,011	0,0065	0,69	0,05625	0,09025	0,019	0,1645	0,10275	0,00625
RF_075	1	18,2	30	1	0,023	0,00725	0,017	0,005	0,0045	0,34	0,0455	0,0335	0,012	0,06275	0,05225	0,00375
RF_076	1	20,3	120	1	0,02325	0,00575	0,014	0,007	0,00375	0,24775	0,02875	0,02875	0,00875	0,046	0,02675	0,002
RF_078	0	25,6	240	1	0,02775	0,0085	0,015	0,00525	0,00525	0,3375	0,044	0,03825	0,012	0,0655	0,0365	0,00325
RF_079	0	24	10	1	0,030769231	0,014871795	0,044358974	0,015384615	0,009230769	0,512820513	0,028205128	0,10025641	0,017179487	0,176666667	0,102051282	0,002564103
RF_080	0	22,7	240	1	0,02675	0,0085	0,02675	0,0105	0,008	0,325	0,036	0,0555	0,01625	0,12425	0,051	0,00325
RF_081	0	20,8	180	1	0,019	0,0045	0,0125	0,0055	0,00575	0,26	0,03075	0,02625	0,0105	0,0545	0,0415	0,004
RF_082	1	23,5	120	1	0,02475	0,00675	0,01825	0,00775	0,007	0,31	0,03025	0,036	0,00775	0,06475	0,05	0,0035
RF_083	1	57,1	180	1	0,0265	0,0085	0,024	0,0095	0,0085	0,3525	0,03975	0,043	0,01375	0,09375	0,06175	0,00375
RF_084	1	25,8	240	1	0,02625	0,0055	0,015	0,00425	0,00475	0,35	0,04825	0,044	0,014	0,04825	0,0335	0,00325
RF_085	1	30,2	30	1	0,032	0,00975	0,02325	0,006	0,00975	0,41	0,05725	0,048	0,016	0,07975	0,04625	0,002
RF_086	1	33,5	180	1	0,02875	0,006	0,02025	0,0075	0,00475	0,28	0,03675	0,03575	0,0105	0,10425	0,0415	0,00425
RF_087	0	18,7	240	1	0,02175	0,006	0,019	0,006	0,00475	0,2575	0,03	0,04	0,01025	0,06775	0,03825	0,00275
RF_088	0	18	10	1	0,02525	0,0065	0,02425	0,00875	0,00575	0,3425	0,031	0,04275	0,01	0,0975	0,04575	0,0045
RF_089	0	18,3	180	1	0,04375	0,015	0,0195	0,0125	0,008	0,63	0,07225	0,057	0,0215	0,04225	0,0975	0,0015
RF_090	1	19,2	15	1		0,0155	0,0305	0,013	0,013	0,655	0,057	0,0605	0,0175	0,0885	0,1035	0,007
RF_091	0	19,6	240	1		0,0045	0,01725	0,006	0,0065	0,2115	0,0285	0,03075	0,00825	0,0655	0,04725	0,003
RF_092	0	18,5	10	1	0,023	0,0055	0,01725	0,00625	0,006	0,285	0,03425	0,04125	0,01175	0,06825	0,041	0,00175
RF_093	0	18,4	240	1	0,02525	0,01125	0,04	0,013	0,01025	0,3475	0,03675	0,06275	0,0165	0,1355	0,06275	0,00475
RF_094	0	19,4	180	1	0,028	0,00775	0,01975	0,00875	0,00725	0,3775	0,04225	0,05725	0,01575	0,0565	0,0575	0,00425
RF_095	0	57,6	10	1		0,004	0,01775	0,0055	0,0035	0,28	0,03875	0,035	0,0095	0,05475	0,03775	0,00175
RF_096	1	18,5	10	1	0,0275	0,00925	0,03	0,01075	0,00475	0,44	0,04275	0,06925	0,018	0,08775	0,081	0,0015
RF_097	1	18,7	270	1	0,0195	0,00875	0,012	0,00425	0,0045	0,2575	0,0355	0,04225	0,01675	0,03425	0,03025
RF_098	0	19,2	60	1		0,00475	0,0145	0,00675	0,0075	0,2345	0,02125	0,03175	0,0105	0,04725	0,03575	0,00275
RF_100	0	20,2	150	1	0,02275	0,00725	0,019	0,00725	0,0055	0,2875	0,031	0,044	0,01325	0,06125	0,044	0,00375
RF_101	1	18,5	180	1	0,0265	0,00875	0,018	0,005	0,0055	0,3575	0,027	0,04475	0,015	0,05875	0,055	0,0025
RF_102	0	21	180	1		0,0055	0,01525	0,0065	0,00675	0,2875	0,038	0,03425	0,01325	0,0615	0,039	0,00275
RF_103	1	69	180	1		0,00425	0,0095	0,00375		0,20375	0,025	0,02375	0,00875	0,036	0,02825	0,002
RF_104	1	23	10	1	0,0185	0,0055	0,0195	0,00725	0,00775	0,3425	0,03075	0,04475	0,012	0,0785	0,0645	0,004
RF_105	1	21	120	1		0,0055	0,0135	0,00475	0,00575	0,3375	0,03375	0,04375	0,01225	0,064	0,056	0,003
RF_106	1	19	60	1	0,0185	0,00525	0,0095	0,0035	0,006	0,199	0,02625	0,02625	0,01025	0,031	0,02575	0,002
